# Supplementary material
Source: MDPI journal article supplement (https://www.mdpi.com/2311-5637/8/11/652)
Supplement: s1 [file s1]

# **Overexpression of LAS21 in cellulase-displaying *Saccharomyces cerevisiae* for high-yield ethanol production from pretreated sugarcane bagasse**

Jantima Arnthong<sup>1</sup>, Piyada Bussadee<sup>1</sup>, Apisan Phienluphon<sup>1</sup>, Pacharawan Deenarn<sup>1</sup>, Kan Tulsook<sup>1</sup>, Sa-ngapong Plupjeen<sup>1</sup>, Chatuphon Siamphan<sup>1</sup>, Chakrit Tachaapaikoon<sup>2</sup>, Verawat Champreda<sup>1</sup>, and Surisa Suwannarangsee<sup>1\*</sup>

<sup>1</sup> National Center for Genetic Engineering and Biotechnology (BIOTEC), National Science and Technology Development Agency (NSTDA), 113 Thailand Science Park, Klong Luang, Pathumthani 12120, Thailand

<sup>2</sup> Excellent Center of Enzyme Technology and Microbial Utilization, Pilot Plant Development and Training Institute, King Mongkut's University of Technology Thonburi, Bangkok 10150, Thailand

## **\* Correspondence:**

Dr. Surisa Suwannarangsee

Email: [surisa.suw@biotec.or.th](mailto:surisa.suw@biotec.or.th)

**Table S1** List of primers used in this study.

| Primers                                                                           | Sequences (5'-3')                                                                                |
|-----------------------------------------------------------------------------------|--------------------------------------------------------------------------------------------------|
| <b>Cloning of genes encoding GPI-biosynthesis and remodeling related proteins</b> |                                                                                                  |
| BST1_SacI_F                                                                       | AATTGAGCTCATGGGTATCAGGAGATTAGTTAGTGTTA                                                           |
| BST1_NotI_R                                                                       | AATTGCGGCCGCGCATGTATTGTTTCGAAAAATAGCAACCAGG                                                      |
| CWH43_BamHI_F                                                                     | AATTGGATCCATGCTGATCATCAATGGGAAGATCATC                                                            |
| CWH43_NotI_R                                                                      | AATTGCGGCCGCGCTAAGTAATAACGTGGCTCATCAAAAACATG                                                     |
| ERI1_BamHI_F                                                                      | AATTGGATCCATGAGACCACGTGACCAAGGCTT                                                                |
| ERI1_NotI_R                                                                       | AATTGCGGCCGCGCTTCATCTTTACTACTTGCGAACATTTTAC                                                      |
| GPI1_BamHI_F                                                                      | AATTGGATCCATGCCAAATTACATTTTCTGGCCATAC                                                            |
| GPI1_NotI_R                                                                       | AATTGCGGCCGCGCTGCCTGAATAGTCAGCCTTTTGTATAAATC                                                     |
| GUP1_BamHI_F                                                                      | AATTGGATCCATGTCGCTGATCAGCATCCTGTC                                                                |
| GUP1_NotI_R                                                                       | AATTGCGGCCGCGCGCATTTTAGGTAAATTCCGTGCCTCTT                                                        |
| LAS21_BamHI_F                                                                     | AATTGGATCCATGAACTTGAAGCAGTTCACGTGCC                                                              |
| LAS21_NotI_R                                                                      | AATTGCGGCCGCGCATCAAGAGCGCAAAGGAGGGCC                                                             |
| PER1_BamHI_F                                                                      | AATTGGATCCATGAGGTTAGCTGTGGTTGTGACC                                                               |
| PER1_NotI_R                                                                       | AATTGCGGCCGCGCGTACAATTGTCTATTACCCCAATAGGC                                                        |
| <b>Single guide RNA (For cloning to pML104-kan)</b>                               |                                                                                                  |
| sgRNA-URA3-F                                                                      | GATCCTGGAGTTAGTTGAAGCATTGTTTTAGAGCTAG                                                            |
| sgRNA-URA3-R                                                                      | CTAGCTCTAAAACAATGCTTCAACTAACTCCAG                                                                |
| sgRNA-LEU2-F                                                                      | GATCGATTTTCGAAAATCATTTAATGTTTTAGAGCTAG                                                           |
| sgRNA-LEU2-R                                                                      | CTAGCTCTAAAACATTAAATGATTTTCGAAATC                                                                |
| sgRNA-ADE2-F                                                                      | GATCGGAGCCATTAACGTGGTCATGTTTTAGAGCTAG                                                            |
| sgRNA-ADE2-R                                                                      | CTAGCTCTAAAACATGACCACGTTAATGGCTCC                                                                |
| sgRNA-TRP1-F                                                                      | GATCCACAGGTAGTTCTGGTCCATGTTTTAGAGCTAG                                                            |
| sgRNA-TRP1-R                                                                      | CTAGCTCTAAAACATGGACCAGAACTACCTGTG                                                                |
| sgRNA-HIS3-F                                                                      | GATCCAGATTGCGATCTCTTTAAAGTTTTAGAGCTAG                                                            |
| sgRNA-HIS3-R                                                                      | CTAGCTCTAAAACCTTAAAGAGATCGCAATCTG                                                                |
| <b>Nonsense mutation oligonucleotides (For gene disruption by CRISPR-Cas9)</b>    |                                                                                                  |
| Oligo-URA3-F                                                                      | CATTGGATGTTTCGTACCACCAAGGAATTACTGGAGTTAGTTGAAGCATTAGG<br>TCCCTAAATTTGTTTACTAAAACACATGTGGATATCTTG |
| Oligo-URA3-R                                                                      | CAAGATATCCACATGTGTTTTAGTAAACAAATTTAGGGACCTAATGCTTCAA<br>CTAACTCCAGTAATTCCTTGGTGGTACGAACATCCAATG  |
| Oligo-LEU2-F                                                                      | GCTATTTCTGATGTTTCGTTCCAATGTCAAGTTCCATTTTCGAAAATCATTTAAT<br>TGGTGGTGTCTATCTAGGCTACAGGTGTTCACTTC   |
| Oligo-LEU2-R                                                                      | GAAGTGAACACCTGTAGCCTAGATAGCAGCACCACCAATTAAATGATTTTCG<br>AAATGGAACCTTGACATTGGAACGAACATCAGAAATAGC  |

---

|              |                                                                                               |
|--------------|-----------------------------------------------------------------------------------------------|
| Oligo-ADE2-F | GAAAATTCTCCTGCCAAACAAATAAGCAACTTCAATGACCACGTTAATGGCT<br>CCTTTTCAATCCTCTTGATATCGAAAACTAGCTGAA  |
| Oligo-ADE2-R | TTCAGCTAGTTTTTCGATATCAAGAGGATTGAAAAGGAGCCATTAACGTGGT<br>CATTGAAGTTGCTTATTTGTTTGGCAGGAGAATTTTC |
| Oligo-TRP1-F | ACACAAAGGCAGCTTGGAGTATGTCTGTTATTAATTTACAGGTAGTTCTGG<br>TCCATATTGAAAGTTTGCGGCTTGCAGAGCACAGAGGC |
| Oligo-TRP1-R | GCCTCTGTGCTCTGCAAGCCGAAACTTTCAATATGGACCAGAACTACCTGT<br>GAAATTAATAACAGACATACTCCAAGCTGCCTTTGTGT |
| Oligo-HIS3-F | GTAAAGCGTATTACAAATGAAACCAAGATTCAGATTGCGATCTCTTTAAACT<br>TGGTCCCCTAGCGATAGAGCACTCGATCTTCCCAG   |
| Oligo-HIS3-R | CTGGGAAGATCGAGTGCTCTATCGCTAGGGGACCAAGTTTAAAGAGATCGC<br>AATCTGAATCTTGGTTTCATTTGTAATACGCTTTAC   |

---

**Table S2** Recombinant vectors used in this study.

| Recombinant vector                                                                                                            | Cellulase/Gene         | Source                             | Selective marker | Description                                 | References               |
|-------------------------------------------------------------------------------------------------------------------------------|------------------------|------------------------------------|------------------|---------------------------------------------|--------------------------|
| <b>For screening of cellulase sources and GPI-biosynthesis and remodeling related proteins in <i>S. cerevisiae</i> INVSc1</b> |                        |                                    |                  |                                             |                          |
| pYES3/CT (pY)                                                                                                                 | -                      | -                                  | <i>TRP1</i>      | Expression vector with <i>GAL1</i> promoter | Invitrogen               |
| pYES3-Ura (pY-U)                                                                                                              | -                      | -                                  | <i>URA3</i>      | pY with <i>URA3</i> selective marker        | This study               |
| pSS <sub>SUC2</sub> -PBGL1-21_Sc                                                                                              | $\beta$ -glucosidase 1 | <i>Periconia</i> sp.               | <i>TRP1</i>      | pY containing PBGL1-21_Sc                   | Phienluphon et al., 2019 |
| pSS <sub>SUC2</sub> -PBGL1-6_K1                                                                                               | $\beta$ -glucosidase 1 | <i>Periconia</i> sp.               | <i>TRP1</i>      | pY containing PBGL1-6_K1                    | Phienluphon et al., 2019 |
| pSS <sub>SUC2</sub> -AaCBHB-6_K1                                                                                              | Cellobiohydrolase B    | <i>Aspergillus aculeatus</i>       | <i>TRP1</i>      | pY containing AaCBHB-6_K1                   | This study               |
| pSS <sub>SUC2</sub> -AaEG1-6_K1                                                                                               | Endoglucanase 1        | <i>Aspergillus aculeatus</i>       | <i>TRP1</i>      | pY containing AaEG1-6_K1                    | This study               |
| pSS <sub>SUC2</sub> -AaEG2-6_K1                                                                                               | Endoglucanase 2        | <i>Aspergillus aculeatus</i>       | <i>TRP1</i>      | pY containing AaEG2-6_K1                    | This study               |
| pSS <sub>SUC2</sub> -AaBGL1-6_K1                                                                                              | $\beta$ -glucosidase 1 | <i>Aspergillus aculeatus</i>       | <i>TRP1</i>      | pY containing AaBGL1-6_K1                   | This study               |
| pSS <sub>SUC2</sub> -ChCBH2-6_K1                                                                                              | Cellobiohydrolase 2    | <i>Cochliobolus heterostrophus</i> | <i>TRP1</i>      | pY containing ChCBH2-6_K1                   | This study               |
| pSS <sub>SUC2</sub> -ChEG2-6_K1                                                                                               | Endoglucanase 2        | <i>Cochliobolus heterostrophus</i> | <i>TRP1</i>      | pY containing ChEG1-6_K1                    | This study               |
| pSS <sub>SUC2</sub> -ChBGL1-6_K1                                                                                              | $\beta$ -glucosidase 1 | <i>Cochliobolus heterostrophus</i> | <i>TRP1</i>      | pY containing ChBGL1-6_K1                   | This study               |
| pSS <sub>SUC2</sub> -CiCBH2-6_K1                                                                                              | Cellobiohydrolase 2    | <i>Chrysosporium lucknowense</i>   | <i>TRP1</i>      | pY containing CiCBH2-6_K1                   | This study               |
| pSS <sub>SUC2</sub> -HiEG1-6_K1                                                                                               | Endoglucanase 1        | <i>Humicola insolens</i>           | <i>TRP1</i>      | pY containing HiEG1-6_K1                    | This study               |
| pSS <sub>SUC2</sub> -PdBGL1-6_K1                                                                                              | $\beta$ -glucosidase 1 | <i>Penicillium decumbens</i>       | <i>TRP1</i>      | pY containing PdBGL1-6_K1                   | This study               |
| pSS <sub>SUC2</sub> -TrCBH1-6_K1                                                                                              | Cellobiohydrolase 1    | <i>Trichoderma reesei</i>          | <i>TRP1</i>      | pY containing TrCBH1-6_K1                   | This study               |
| pSS <sub>SUC2</sub> -TrCBH2-6_K1                                                                                              | Cellobiohydrolase 2    | <i>Trichoderma reesei</i>          | <i>TRP1</i>      | pY containing TrCBH2-6_K1                   | This study               |
| pSS <sub>SUC2</sub> -TrEG2-6_K1                                                                                               | Endoglucanase 2        | <i>Trichoderma reesei</i>          | <i>TRP1</i>      | pY containing TrEG2-6_K1                    | This study               |
| pSS <sub>SUC2</sub> -AtCBH1-6_K1                                                                                              | Cellobiohydrolase 1    | <i>Acremonium thermophilum</i>     | <i>TRP1</i>      | pY containing AtCBH1-6_K1                   | This study               |

|                                                                                         |                 |                                 |             |                                            |                       |
|-----------------------------------------------------------------------------------------|-----------------|---------------------------------|-------------|--------------------------------------------|-----------------------|
| pSS <sub>SUC2</sub> - <i>TtEG1</i> -6_K1                                                | Endoglucanase 1 | <i>Thielavia terrestris</i>     | <i>TRP1</i> | pY containing <i>TtEG1</i> -6_K1           | This study            |
| pY-U-BST1                                                                               | BST1            | <i>Saccharomyces cerevisiae</i> | <i>URA3</i> | pY-U containing enhancing gene BST1        | This study            |
| pY-U-CWH43                                                                              | CWH43           | <i>Saccharomyces cerevisiae</i> | <i>URA3</i> | pY-U containing enhancing gene CWH43       | This study            |
| pY-U-ERI1                                                                               | ERI1            | <i>Saccharomyces cerevisiae</i> | <i>URA3</i> | pY-U containing enhancing gene ERI1        | This study            |
| pY-U-GPI1                                                                               | GPI1            | <i>Saccharomyces cerevisiae</i> | <i>URA3</i> | pY-U containing enhancing gene GPI1        | This study            |
| pY-U-GUP1                                                                               | GUP1            | <i>Saccharomyces cerevisiae</i> | <i>URA3</i> | pY-U containing enhancing gene GUP1        | This study            |
| pY-U-LAS21                                                                              | LAS21           | <i>Saccharomyces cerevisiae</i> | <i>URA3</i> | pY-U containing enhancing gene LAS21       | This study            |
| pY-U-PER1                                                                               | PER1            | <i>Saccharomyces cerevisiae</i> | <i>URA3</i> | pY-U containing enhancing gene PER1        | This study            |
| <b>For auxotrophic gene disruption by CRISPR/Cas9 in <i>S. cerevisiae</i> TISTR5088</b> |                 |                                 |             |                                            |                       |
| pML104                                                                                  | -               | -                               | <i>URA3</i> | CRISPR/Cas9 expression vector              | Laughery et al., 2015 |
| pML104-kan                                                                              | -               | -                               | <i>kan</i>  | pML104 with <i>kan</i> selective marker    | This study            |
| pML104-kan-ADE2                                                                         | -               | -                               | <i>kan</i>  | ADE2 gene disruption by CRISPR/Cas9 system | This study            |
| pML104-kan-LEU2                                                                         | -               | -                               | <i>kan</i>  | LEU2 gene disruption by CRISPR/Cas9 system | This study            |
| pML104-kan-HIS3                                                                         | -               | -                               | <i>kan</i>  | HIS3 gene disruption by                    | This study            |

|                                                                     |                        |                                  |             |                                                     |                  |
|---------------------------------------------------------------------|------------------------|----------------------------------|-------------|-----------------------------------------------------|------------------|
|                                                                     |                        |                                  |             | CRISPR/Cas9 system                                  |                  |
| pML104-kan-TRP1                                                     | -                      | -                                | <i>kan</i>  | TRP1 gene disruption by CRISPR/Cas9 system          | This study       |
| pML104-kan-URA3                                                     | -                      | -                                | <i>kan</i>  | URA3 gene disruption by CRISPR/Cas9 system          | This study       |
| <b>For multi-copy integration in <i>S. cerevisiae</i> TISTR5088</b> |                        |                                  |             |                                                     |                  |
| pASB                                                                | -                      | -                                | <i>URA3</i> | Integrative vector to rDNA                          | Laboratory stock |
| pASB- <i>TrEG2</i> -Ura3                                            | Endoglucanase 2        | <i>Trichoderma reesei</i>        | <i>URA3</i> | Vector containing <i>TrEG2</i> -6_K1 gene cassette  | This study       |
| pASB- <i>C/CBH2</i> -Leu2                                           | Cellobiohydrolase 2    | <i>Chrysosporium lucknowense</i> | <i>LEU2</i> | Vector containing <i>C/CBH2</i> -6_K1 gene cassette | This study       |
| pASB- <i>PBGL1</i> -Ade2                                            | $\beta$ -glucosidase 1 | <i>Periconia</i> sp.             | <i>ADE2</i> | Vector containing <i>PBGL1</i> -21_Sc gene cassette | This study       |
| pASB-LAS-Ade2                                                       | LAS21                  | <i>Saccharomyces cerevisiae</i>  | <i>ADE2</i> | Vector containing LAS21 gene cassette               | This study       |
| pASB- <i>C/CBH2</i> -Trp1                                           | Cellobiohydrolase 2    | <i>Chrysosporium lucknowense</i> | <i>TRP1</i> | Vector containing <i>C/CBH2</i> -6_K1 gene cassette | This study       |
| pASB- <i>TrEG2</i> -His4                                            | Endoglucanase 2        | <i>Trichoderma reesei</i>        | <i>HIS4</i> | Vector containing <i>TrEG2</i> -6_K1 gene cassette  | This study       |

**Table S3** Primers for real-time PCR based determination of gene copy number.

| Gene          | Forward primer (5'→3')     | Reverse primer (5'→3')    |
|---------------|----------------------------|---------------------------|
| <i>Actin</i>  | CCCAGGTATTGCCGAAAGAATGC    | TGGAAGGTAGTCAAAGAAGCCAAGA |
| <i>CICBH2</i> | ACAACAATGGGGTGACTGGT       | GGTTGTAAAGCATCAGACAAACCAC |
| <i>TrEG2</i>  | ACATCTTCATCTACACCACCAACTTC | TGTTGCATTTGACCGATACCATCTG |
| <i>PBGL1</i>  | GATATCATCTACGAACCGACAGC    | CGAGTAGGAGAAGTTGGTGTACG   |
| <i>LAS21</i>  | CTACGCCTCTATTCCAGCACAAG    | CAGCAATCCCATCACAAAATTCCAC |

**Table S4** Determination of gene copy number in *S. cerevisiae* ECBLCCE5.

| Gene          | Gene copy number |
|---------------|------------------|
| <i>CICBH2</i> | 16               |
| <i>TrEG2</i>  | 9                |
| <i>PBGL1</i>  | 15               |
| <i>LAS21</i>  | 2                |

**Table S5** Enzyme activity profile of commercial cellulase.

| Enzyme                | Cellulase C | Ctec2 |
|-----------------------|-------------|-------|
| FPase (U/FPU)         | 1           | 1     |
| CMCase (U/FPU)        | 34.8        | 38.5  |
| β-glucosidase (U/FPU) | 7.2         | 61.8  |
| Xylanase (U/FPU)      | 791         | 45.2  |

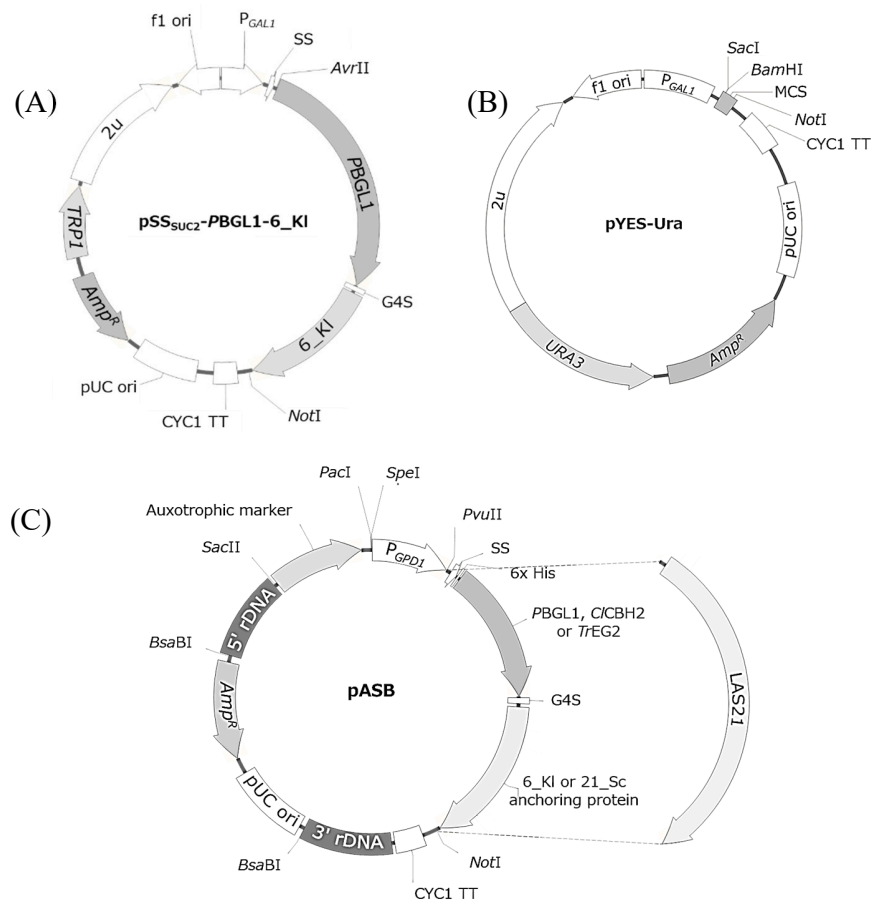

**Figure S1** Feature maps of plasmids pSS<sub>SUC2</sub>-PBGL1-6\_KI (A), pYES3-Ura (B), and pASB (C) series.
